# Supplementary material for: Current and projected incidence trends of pediatric-onset inflammatory bowel disease in Germany based on the Saxon Pediatric IBD Registry 2000–2014 –a 15-year evaluation of trends
Source: PubMed Central journal article supplement (PMC9462751; doi:10.1371/journal.pone.0274117), 2022-09-09
Supplement: pone.0274117.s001.pdf [file pone.0274117.s001.pdf]

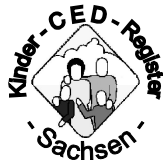

|                                |                  |         |
|--------------------------------|------------------|---------|
| Name, Vorname des Versicherten |                  |         |
|                                |                  | geb. am |
| Kassen-Nr.                     | Versicherten-Nr. | Status  |
| Betriebsstätten-Nr.            | Arzt-Nr.         | Datum   |

Ambulanz:

Vorstellungsdatum:

Einverständniserklärung:  ja  nein      Geburtsdatum Kind:

Geschlecht:  männlich  weiblich      Postleitzahl (PLZ):

Geburtsdatum Mutter:  Größe: ,  cm      Größe: ,  cm  
(Mutter) (Vater)

**Diagnose**

Morbus Crohn       Colitis ulcerosa       Colitis indeterminata

**Anamnese**

Gewicht: ,  kg      Größe: ,  cm (bei Diagnosestellung, sofern vorhanden)

Auftreten erster Symptome:  /  (Monat / Jahr)

**Symptomatik bis zur Diagnosestellung:**

- sichtbares Blut im Stuhl
- Durchfall
- Bauchschmerzen
- Gewichtsstillstand/-verlust
- Wachstumsstörung
- Fieber
- andere: \_\_\_\_\_
- Anämie
- Leistungsknick
- Perianalfistel
- sonstige Fistel
- Perianale Läsion
- Appetitlosigkeit

**Extraintestinale Symptome:**

keine

- Auge
- Fieber > 38,5°C > 3 Tage
- Haut
- Leber/Gallenwege/Pankreas, insbesondere
- Gelenk: Entzündung
- Wirbelsäule
- andere: \_\_\_\_\_
- PSC
- Gelenke: Schmerzen

Datum der Diagnosestellung:  /  (Monat / Jahr)

Diagnosestellung durch:  Kindergastroenterologe       Internist / Allgemeinmediziner  
 anderer Kinderarzt       Kinderchirurg / Chirurg  
 Gastroenterologe, Erwachsene

Diagnosestellung in:  eigener Klinik       anderer Klinik  
 Praxis

Anzahl leiblicher Geschwister:      Schwestern:       Brüder:       Zwillingsgeschwister?

CED in der Familie:  nein  
 (nur leibliche!)

|                  | Mutter                   | Vater                    | Geschwister          | 2. Grades                |
|------------------|--------------------------|--------------------------|----------------------|--------------------------|
| Morbus Crohn     | <input type="checkbox"/> | <input type="checkbox"/> | <input type="text"/> | <input type="checkbox"/> |
| Colitis ulcerosa | <input type="checkbox"/> | <input type="checkbox"/> | <input type="text"/> | <input type="checkbox"/> |

Ausfüll-Datum:

**Unterschrift:**
