# Supplementary material for: Current and projected incidence trends of pediatric-onset inflammatory bowel disease in Germany based on the Saxon Pediatric IBD Registry 2000–2014 –a 15-year evaluation of trends
Source: PubMed Central journal article supplement (PMC9462751; doi:10.1371/journal.pone.0274117), 2022-09-09
Supplement: pone.0274117.s002.pdf [file pone.0274117.s002.pdf]

Automated,  
individual related data  
of the health insurance

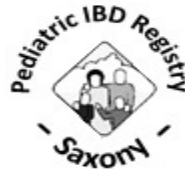

INFLAMMATORY BOWEL DISEASE (IBD)  
IN CHILDREN AND ADOLESCENTS  
**INITIAL REGISTRATION FORM**

Outpatient department:

Date of visit:   
Presentation of the patient

Informed consent:  yes  no Date of birth - Child:

Gender:  male  female Zip Code:   
Date of birth - Mother:  Height: ,  cm (Mother) Height: ,  cm (Father)

**Diagnosis**

Crohn`s disease  Ulcerative colitis  Unclassified IBD

**Medical History**

Weight: ,  kg Height: ,  cm ( At the date of the diagnosis, if available )

Occurrence of first symptoms:  /  (Month/Year)

**Symptomatology until diagnosis:**

- Visible fecal blood
- Diarrhea
- Abdominal aches
- Weight loss/stagnation
- Growth retardation
- Pyrexia
- Other: \_\_\_\_\_
- Anemia
- Poor performance
- Perianal fistula
- Other fistulae
- Perianal lesion
- Loss of appetite

**Extraintestinal symptoms:**

- Eyes
- Skin
- Liver/Bile tracts/Pancreas, especially
- Joints: Inflammation
- Spinal column
- Other: \_\_\_\_\_
- Pyrexia >38.5°C > 3 days
- Joints: Pains
- PSC

None

Date of Diagnosis:  /  (Month/Year)

Diagnosis by:  Pediatric gastroenterologist  Internist / general practitioner  
 Another pediatrician  Pediatric surgeon / Surgeon  
 Gastroenterologist for adults

Diagnosis at:  Own clinic  Practice  Another clinic

Number of biological siblings: Sisters:  Brothers:  Twins?

IBD in the family:  no  
(only biological relatives!)

|                    | Mother                   | Father                   | Siblings             | 2 <sup>nd</sup> Grade    |
|--------------------|--------------------------|--------------------------|----------------------|--------------------------|
| Crohn`s disease    | <input type="checkbox"/> | <input type="checkbox"/> | <input type="text"/> | <input type="checkbox"/> |
| Ulcerative colitis | <input type="checkbox"/> | <input type="checkbox"/> | <input type="text"/> | <input type="checkbox"/> |

(Version 06/18)

Date of Completion: **Signature:**
