# Supplementary material for: Current and projected incidence trends of pediatric-onset inflammatory bowel disease in Germany based on the Saxon Pediatric IBD Registry 2000–2014 –a 15-year evaluation of trends
Source: PubMed Central journal article supplement (PMC9462751; doi:10.1371/journal.pone.0274117), 2022-09-09
Supplement: pone.0274117.s003.pdf [file pone.0274117.s003.pdf]

CHRONISCH ENTZÜNDLICHE DARMERKRANKUNGEN (CED)

BEI KINDERN UND JUGENDLICHEN

DOKUMENTATIONSBOGEN

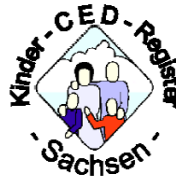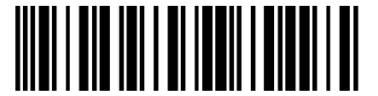

|                                |                  |         |
|--------------------------------|------------------|---------|
| Name, Vorname des Versicherten |                  |         |
|                                |                  | geb. am |
| Kassen-Nr.                     | Versicherten-Nr. | Status  |
| Betriebsstätten-Nr.            | Arzt-Nr.         | Datum   |

|                              |                      |
|------------------------------|----------------------|
| Vorstellungsdatum aktuell    | <input type="text"/> |
| Vorstellungsdatum vorheriges | <input type="text"/> |

|            |                                                                                                                              |                                                             |                                                                                                                         |                                         |                                                                 |                     |
|------------|------------------------------------------------------------------------------------------------------------------------------|-------------------------------------------------------------|-------------------------------------------------------------------------------------------------------------------------|-----------------------------------------|-----------------------------------------------------------------|---------------------|
| Basisdaten | <b>Vorstellungsart</b>                                                                                                       | <b>Untersuchungsanlass</b>                                  | <b>Diagnose</b>                                                                                                         | <b>Wechsel</b> <input type="checkbox"/> | <b>Größe</b> [cm] <input type="text"/> , <input type="text"/>   | <b>Knochenalter</b> |
|            | <input type="radio"/> ambulant<br><input type="radio"/> stationär<br><input type="checkbox"/> andere chronische Erkrankungen | <input type="radio"/> geplant<br><input type="radio"/> akut | <input type="radio"/> M. Crohn<br><input type="radio"/> Colitis ulcerosa<br><input type="radio"/> Colitis indeterminata |                                         |                                                                 |                     |
|            |                                                                                                                              |                                                             |                                                                                                                         |                                         | <b>Gewicht</b> [kg] <input type="text"/> , <input type="text"/> |                     |

|          |                                                                                                                                                                      |                                                                                            |                                                                                                                  |                                                                                                                     |                                                                                                                                                                        |                                                                                                                                                                             |
|----------|----------------------------------------------------------------------------------------------------------------------------------------------------------------------|--------------------------------------------------------------------------------------------|------------------------------------------------------------------------------------------------------------------|---------------------------------------------------------------------------------------------------------------------|------------------------------------------------------------------------------------------------------------------------------------------------------------------------|-----------------------------------------------------------------------------------------------------------------------------------------------------------------------------|
| Anamnese | <b>Befinden</b>                                                                                                                                                      | <b>Appetit</b>                                                                             | <b>Alltagsaktivität</b>                                                                                          | <b>Stuhlgang</b>                                                                                                    |                                                                                                                                                                        | <b>Bauchschmerzen</b>                                                                                                                                                       |
|          | <input type="radio"/> sehr gut<br><input type="radio"/> gut<br><input type="radio"/> mittel<br><input type="radio"/> schlecht<br><input type="radio"/> sehr schlecht | <input type="radio"/> gut<br><input type="radio"/> mäßig<br><input type="radio"/> schlecht | Einschränkung<br><input type="radio"/> keine<br><input type="radio"/> geringe<br><input type="radio"/> deutliche | <b>Konsistenz</b><br><input type="radio"/> geformt<br><input type="radio"/> breiig<br><input type="radio"/> flüssig | <b>Blut im Stuhl</b><br><input type="radio"/> nein<br><input type="radio"/> gelegentlich, wenig<br><input type="radio"/> meistens, wenig<br><input type="radio"/> viel | <input type="radio"/> keine<br><input type="radio"/> leichte<br><input type="radio"/> mittelschwere<br><input type="radio"/> schwere<br><input type="checkbox"/> nächtliche |
|          |                                                                                                                                                                      | <b>Schulfehltag</b> <input type="text"/>                                                   | <b>Tage</b> <input type="text"/>                                                                                 |                                                                                                                     | <input type="text"/> / tagsüber<br><input type="text"/> / nachts                                                                                                       |                                                                                                                                                                             |

|              |                                                                                                                                                                                               |                                                                                                                                                                                                                                                                 |                                                                                                                                                                                                                                                                                            |                                                                                                                                                                                       |
|--------------|-----------------------------------------------------------------------------------------------------------------------------------------------------------------------------------------------|-----------------------------------------------------------------------------------------------------------------------------------------------------------------------------------------------------------------------------------------------------------------|--------------------------------------------------------------------------------------------------------------------------------------------------------------------------------------------------------------------------------------------------------------------------------------------|---------------------------------------------------------------------------------------------------------------------------------------------------------------------------------------|
| Untersuchung | <b>Abdominalbefund</b>                                                                                                                                                                        | <b>Analbefund</b>                                                                                                                                                                                                                                               | <b>Extraintestinale Symptome</b>                                                                                                                                                                                                                                                           | <b>Lippen- / Mundbeteiligung</b>                                                                                                                                                      |
|              | <input type="radio"/> unauffällig<br><input type="checkbox"/> Druckschmerz<br><input type="checkbox"/> Resistenz<br><input type="checkbox"/> Abwehrspannung<br><input type="checkbox"/> Stoma | <input type="radio"/> unauffällig/reizlose Marissen<br><input type="radio"/> Rhagade/Fissur<br><input type="radio"/> inaktive Fistel<br><input type="radio"/> sezernierende Fistel/Abszess entzündliche Induration<br><input type="checkbox"/> perianales Ekzem | <input type="radio"/> keine<br><input type="checkbox"/> Auge<br><input type="checkbox"/> Fieber > 38,5°C > 3 Tage<br><input type="checkbox"/> Haut<br><input type="checkbox"/> Wirbelsäule<br><input type="checkbox"/> Leber/Gallenwege/Pankreas<br><input type="checkbox"/> andere: _____ | <input type="radio"/> nein<br><input type="radio"/> ja<br><input type="checkbox"/> Gelenke: Schmerzen<br><input type="checkbox"/> Gelenke: Entzündung<br><input type="checkbox"/> PSC |
|              | <b>Pubertät nach Tanner</b> PH <input type="text"/> (1-5) B <input type="text"/> (1-5)                                                                                                        | <b>Hodenvolumen</b> <input type="text"/> ml                                                                                                                                                                                                                     | <b>Menarche</b> <input type="radio"/> nein <input type="radio"/> ja <input type="text"/> (Jahr)                                                                                                                                                                                            |                                                                                                                                                                                       |

|       |                                                                                                 |                                                                                                 |                                                                                                     |                                                                                                                                             |
|-------|-------------------------------------------------------------------------------------------------|-------------------------------------------------------------------------------------------------|-----------------------------------------------------------------------------------------------------|---------------------------------------------------------------------------------------------------------------------------------------------|
| Labor | <b>Hämoglobin</b> <input type="text"/> <input type="radio"/> mmol/l <input type="radio"/> g/dl  | <b>CRP</b> <input type="text"/> <input type="radio"/> mg/l <input type="radio"/> mg/dl          | <b>Lipase</b> <input type="text"/> <input type="radio"/> µmol/l*s <input type="radio"/> U/l         | <b>Calprotectin</b> <input type="text"/> <input type="radio"/> mg/kg <input type="radio"/> mg/l                                             |
|       | <b>Hämatokrit</b> <input type="text"/> <input type="radio"/> %                                  | <b>BSG</b> <input type="text"/>                                                                 | <b>MCV</b> <input type="text"/> <input type="radio"/> fl <input type="radio"/> µm³                  | <b>Laktoferrin</b> <input type="text"/> <input type="radio"/> mg/kg <input type="radio"/> mg/l                                              |
|       | <b>Thrombozyten</b> <input type="text"/> <input type="radio"/> Gpt/l <input type="radio"/> 1/µl | <b>ALAT (GPT)</b> <input type="text"/> <input type="radio"/> µmol/l*s <input type="radio"/> U/l | <b>Albumin i.S.</b> <input type="text"/> <input type="radio"/> g/l <input type="radio"/> g/dl       | <b>Urinuntersuchung</b>                                                                                                                     |
|       | <b>Leukozyten</b> <input type="text"/> <input type="radio"/> Gpt/l <input type="radio"/> 1/µl   | <b>Gamma-GT</b> <input type="text"/> <input type="radio"/> µmol/l*s <input type="radio"/> U/l   | <b>Kreatinin i.S.</b> <input type="text"/> <input type="radio"/> µmol/l <input type="radio"/> mg/dl | <input type="radio"/> n. durchgef. <input type="checkbox"/> Proteinurie<br><input type="radio"/> unauff. <input type="checkbox"/> Hämaturie |

|                       |                                                      |                                         |                                        |                                     |                                          |                                                        |
|-----------------------|------------------------------------------------------|-----------------------------------------|----------------------------------------|-------------------------------------|------------------------------------------|--------------------------------------------------------|
| Apparative Diagnostik | <input type="radio"/> keine                          | <input type="checkbox"/> Ileokoloskopie | <input type="checkbox"/> Rö-Sellink    | <input type="checkbox"/> MRT Becken | <input type="checkbox"/> CT Bauch        | <b>Komplikationen / OP</b> <input type="radio"/> keine |
|                       | <input type="checkbox"/> Ösophagogastroduodenoskopie | <input type="checkbox"/> Koloskopie     | <input type="checkbox"/> MRT Darm      | <input type="checkbox"/> Histologie | <input type="checkbox"/> Perianalfistel  | <input type="checkbox"/> sonstige Fistel               |
|                       | <input type="checkbox"/> Rektosigmoidoskopie         | <input type="checkbox"/> Ultraschall    | <input type="checkbox"/> andere: _____ |                                     | <input type="checkbox"/> Perianalabszess | <input type="checkbox"/> sonstiger Abszess             |

|              |                                      |                                           |                                                                             |
|--------------|--------------------------------------|-------------------------------------------|-----------------------------------------------------------------------------|
| Lokalisation | <input type="checkbox"/> unauffällig | <input type="checkbox"/> keine Änderungen | <input type="checkbox"/> keine neuen Informationen                          |
|              | <input type="checkbox"/> Ösophagus   | <input type="checkbox"/> übriger Dünndarm | <input type="checkbox"/> Colon asc.                                         |
|              | <input type="checkbox"/> Magen       | <input type="checkbox"/> term. Ileum      | <input type="checkbox"/> Colon trans.                                       |
|              | <input type="checkbox"/> Duodenum    | <input type="checkbox"/> Zökum            | <input type="checkbox"/> Colon desc.                                        |
|              |                                      |                                           | <input type="checkbox"/> Sigmoidium                                         |
|              |                                      |                                           | <input type="checkbox"/> Rektum                                             |
|              |                                      |                                           | <input type="checkbox"/> Pouch                                              |
|              |                                      |                                           | <input type="checkbox"/> intraabdom. Absz. <input type="checkbox"/> Stenose |
|              |                                      |                                           | <input type="checkbox"/> andere: _____                                      |
|              |                                      |                                           | <input type="checkbox"/> OP: _____ Datum                                    |

|                    |                                                                                                                                                       |                                                                                                                                                               |                                                                                                                                                                        |                                                                     |                                                        |
|--------------------|-------------------------------------------------------------------------------------------------------------------------------------------------------|---------------------------------------------------------------------------------------------------------------------------------------------------------------|------------------------------------------------------------------------------------------------------------------------------------------------------------------------|---------------------------------------------------------------------|--------------------------------------------------------|
| Bisherige Therapie | <input type="radio"/> keine Therapie                                                                                                                  | <b>Augenarzttermin seit letzter Vorstellung</b>                                                                                                               | <b>Psychosoziale Therapie</b>                                                                                                                                          |                                                                     |                                                        |
|                    | <b>Oral / i.v. (in mg/d)</b>                                                                                                                          | SASP (Sulfasalazin) <input type="text"/>                                                                                                                      | Budesonid <input type="text"/>                                                                                                                                         | <input type="radio"/> nein<br><input type="radio"/> ja              | <input type="radio"/> nein<br><input type="radio"/> ja |
|                    |                                                                                                                                                       | 5-ASA (Mesalazin) <input type="text"/>                                                                                                                        | <input type="radio"/> Azathioprin <input type="radio"/> 6-MP <input type="text"/>                                                                                      | <b>nicht dokumentierte Vorstellungen seit letzter Dokumentation</b> |                                                        |
|                    |                                                                                                                                                       | Kortikoide <input type="radio"/> i.v. <input type="radio"/> p.o. <input type="text"/>                                                                         | zwischenzeitig Steroidtherapie <input type="radio"/> nein <input type="radio"/> ja                                                                                     | <input type="text"/> (Anzahl der Vorstellungen)                     |                                                        |
|                    | <b>Ern. Therapie</b>                                                                                                                                  | <input type="checkbox"/> ausschließliche <input type="radio"/> p.o. <input type="radio"/> per Sonde <input type="checkbox"/> nächtliche Sondierung            | <input type="checkbox"/> kalorische Supplementierung <input type="checkbox"/> Produkt: _____                                                                           | <b>Einverständniserklärung liegt vor</b> <input type="radio"/> ja   |                                                        |
|                    | <b>Rektal</b>                                                                                                                                         | <input type="checkbox"/> 5-ASA (Mesalazin) <input type="checkbox"/> Kortikoide <input type="checkbox"/> Budesonid                                             |                                                                                                                                                                        | <b>Ärztliche Gesamtbeurteilung</b>                                  |                                                        |
| <b>andere</b>      | <input type="checkbox"/> Methotrexat <input type="checkbox"/> Antibiotika <input type="checkbox"/> Komplementärmedizin <input type="checkbox"/> Eisen | <input type="checkbox"/> Cyclosporin A <input type="checkbox"/> Probiotika <input type="checkbox"/> Calcium/Vitamin D <input type="checkbox"/> Vit. / Spuren. | <input type="radio"/> Remission<br><input type="radio"/> leichte Aktivität<br><input type="radio"/> mittelschwere Aktivität<br><input type="radio"/> schwere Aktivität |                                                                     |                                                        |
|                    | <b>Therapie Nebenwirkung</b> <input type="radio"/> keine <input type="radio"/> ja: _____                                                              |                                                                                                                                                               |                                                                                                                                                                        |                                                                     |                                                        |

Ambulanz-Nr.

Unterschrift:
