# Supplementary material for: Current and projected incidence trends of pediatric-onset inflammatory bowel disease in Germany based on the Saxon Pediatric IBD Registry 2000–2014 –a 15-year evaluation of trends
Source: PubMed Central journal article supplement (PMC9462751; doi:10.1371/journal.pone.0274117), 2022-09-09
Supplement: pone.0274117.s004.pdf [file pone.0274117.s004.pdf]

INFLAMMATORY BOWEL DISEASES (IBD)  
IN CHILDREN AND ADOLESCENTS

DOCUMENTATION FORM

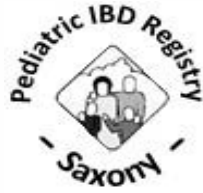

Automated,  
individual related data  
of the health insurance

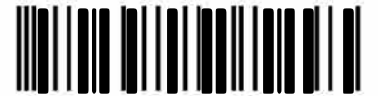

Date of visit  
- actual -

|  |  |  |  |  |  |  |  |  |  |
|--|--|--|--|--|--|--|--|--|--|
|  |  |  |  |  |  |  |  |  |  |
|--|--|--|--|--|--|--|--|--|--|

Date of  
previous visit

|  |  |  |  |  |  |  |  |  |  |
|--|--|--|--|--|--|--|--|--|--|
|  |  |  |  |  |  |  |  |  |  |
|--|--|--|--|--|--|--|--|--|--|

|                                                                                                |                                                                                                                                                                                                                                                                                                                                                                                                                                            |                                                                                                                                                                                                                                                                 |                                                                                                                                                                                                                                                                                          |                                                                                                                                            |                                                                                                                                                                                                                                                                                                                                          |                                                                                                                                                                 |                                                                                                                                                                   |
|------------------------------------------------------------------------------------------------|--------------------------------------------------------------------------------------------------------------------------------------------------------------------------------------------------------------------------------------------------------------------------------------------------------------------------------------------------------------------------------------------------------------------------------------------|-----------------------------------------------------------------------------------------------------------------------------------------------------------------------------------------------------------------------------------------------------------------|------------------------------------------------------------------------------------------------------------------------------------------------------------------------------------------------------------------------------------------------------------------------------------------|--------------------------------------------------------------------------------------------------------------------------------------------|------------------------------------------------------------------------------------------------------------------------------------------------------------------------------------------------------------------------------------------------------------------------------------------------------------------------------------------|-----------------------------------------------------------------------------------------------------------------------------------------------------------------|-------------------------------------------------------------------------------------------------------------------------------------------------------------------|
| Base data                                                                                      | <b>Examination</b>                                                                                                                                                                                                                                                                                                                                                                                                                         | <b>Occasion</b>                                                                                                                                                                                                                                                 | <b>Diagnosis</b>                                                                                                                                                                                                                                                                         | <b>Change</b> <input type="checkbox"/>                                                                                                     | <b>Height</b> [cm] <input type="text"/> , <input type="text"/><br><b>Weight</b> [kg] <input type="text"/> , <input type="text"/>                                                                                                                                                                                                         | <b>Bone Age</b>                                                                                                                                                 |                                                                                                                                                                   |
|                                                                                                | <input type="radio"/> ambulatory<br><input type="radio"/> stationary<br><input type="checkbox"/> other chronic diseases                                                                                                                                                                                                                                                                                                                    | <input type="radio"/> planned<br><input type="radio"/> acute                                                                                                                                                                                                    | <input type="radio"/> Crohn's disease<br><input type="radio"/> Ulcerative Colitis<br><input type="radio"/> Unclassified IBD                                                                                                                                                              |                                                                                                                                            |                                                                                                                                                                                                                                                                                                                                          | <input type="text"/> , <input type="text"/> Years<br><input type="text"/> / <input type="text"/> Inquiry date (month/year)                                      |                                                                                                                                                                   |
| Clinical history                                                                               | <b>State of health</b>                                                                                                                                                                                                                                                                                                                                                                                                                     | <b>Appetite</b>                                                                                                                                                                                                                                                 | <b>Daily activity</b>                                                                                                                                                                                                                                                                    | <b>Stool</b>                                                                                                                               | <b>Number</b><br><input type="text"/> /day<br><input type="text"/> /night                                                                                                                                                                                                                                                                | <b>Stomach Pains</b>                                                                                                                                            |                                                                                                                                                                   |
|                                                                                                | <input type="radio"/> very good<br><input type="radio"/> good<br><input type="radio"/> mediocre<br><input type="radio"/> bad<br><input type="radio"/> very bad                                                                                                                                                                                                                                                                             | <input type="radio"/> good<br><input type="radio"/> moderate<br><input type="radio"/> bad                                                                                                                                                                       | <b>Restrictions</b><br><input type="radio"/> none<br><input type="radio"/> few<br><input type="radio"/> significant<br><b>Absence from school</b> <input type="text"/> days                                                                                                              | <b>Consistency</b><br><input type="radio"/> shaped<br><input type="radio"/> pulpy<br><input type="radio"/> liquid                          |                                                                                                                                                                                                                                                                                                                                          | <b>Fecal Blood</b><br><input type="radio"/> never<br><input type="radio"/> occasionally, few<br><input type="radio"/> mostly, few<br><input type="radio"/> many | <input type="radio"/> none<br><input type="radio"/> slight<br><input type="radio"/> moderate<br><input type="radio"/> heavy<br><input type="checkbox"/> overnight |
| Examination                                                                                    | <b>Abdominal findings</b>                                                                                                                                                                                                                                                                                                                                                                                                                  | <b>Anal findings</b>                                                                                                                                                                                                                                            | <b>Extraintestinal symptoms</b>                                                                                                                                                                                                                                                          |                                                                                                                                            | <b>Involvement a of lips / mouth</b>                                                                                                                                                                                                                                                                                                     |                                                                                                                                                                 |                                                                                                                                                                   |
|                                                                                                | <input type="radio"/> inconspicuous<br><input type="checkbox"/> pressure pain<br><input type="checkbox"/> resistance<br><input type="checkbox"/> muscular defense<br><input type="checkbox"/> stoma                                                                                                                                                                                                                                        | <input type="radio"/> skin tags without irritation<br><input type="radio"/> rhagades/fissures<br><input type="radio"/> inactive fistula<br><input type="radio"/> secreting fistula/abscess<br>inflamming Induration<br><input type="checkbox"/> perianal eczema | <input type="radio"/> none<br><input type="checkbox"/> eyes <input type="checkbox"/> pyrexia >38.5°C > 3 days<br><input type="checkbox"/> skin <input type="checkbox"/> spine column<br><input type="checkbox"/> liver / bile tracts / pancreas<br><input type="checkbox"/> other: _____ |                                                                                                                                            | <input type="radio"/> no <input type="radio"/> yes<br><input type="checkbox"/> joints: pains<br><input type="checkbox"/> joints: inflammation<br><input type="checkbox"/> PSC                                                                                                                                                            |                                                                                                                                                                 |                                                                                                                                                                   |
| <b>Puberty (Tanner scale)</b>                                                                  |                                                                                                                                                                                                                                                                                                                                                                                                                                            | <b>PH</b> <input type="checkbox"/> (1-5)                                                                                                                                                                                                                        | <b>B</b> <input type="checkbox"/> (1-5)                                                                                                                                                                                                                                                  | <b>Testicular volume</b> <input type="text"/> ml                                                                                           | <b>Menarche</b> <input type="radio"/> no <input type="radio"/> yes                                                                                                                                                                                                                                                                       | <input type="text"/> (Year)                                                                                                                                     |                                                                                                                                                                   |
| Laboratory results                                                                             | hemoglobin <input type="text"/> <input type="radio"/> mmol/l <input type="radio"/> g/dl                                                                                                                                                                                                                                                                                                                                                    | CRP <input type="text"/> <input type="radio"/> mg/l <input type="radio"/> mg/dl                                                                                                                                                                                 | Lipase <input type="text"/> <input type="radio"/> μmol/l*s <input type="radio"/> U/l                                                                                                                                                                                                     | Calprotectin <input type="text"/> <input type="radio"/> mg/kg <input type="radio"/> mg/l                                                   |                                                                                                                                                                                                                                                                                                                                          |                                                                                                                                                                 |                                                                                                                                                                   |
|                                                                                                | hematocrit <input type="text"/> <input type="radio"/> %                                                                                                                                                                                                                                                                                                                                                                                    | ESR <input type="text"/> <input type="radio"/> mm/h <input type="radio"/> mm/min                                                                                                                                                                                | MCV <input type="text"/> <input type="radio"/> fl <input type="radio"/> μm <sup>3</sup>                                                                                                                                                                                                  | Lactoferrin <input type="text"/> <input type="radio"/> mg/kg <input type="radio"/> mg/l                                                    |                                                                                                                                                                                                                                                                                                                                          |                                                                                                                                                                 |                                                                                                                                                                   |
|                                                                                                | thrombocytes <input type="text"/> <input type="radio"/> Gpt/l <input type="radio"/> 1/μl                                                                                                                                                                                                                                                                                                                                                   | ALAT (GPT) <input type="text"/> <input type="radio"/> μmol/l*s <input type="radio"/> U/l                                                                                                                                                                        | Albumin i.S. <input type="text"/> <input type="radio"/> g/l <input type="radio"/> g/dl                                                                                                                                                                                                   | <b>Urinalysis</b>                                                                                                                          |                                                                                                                                                                                                                                                                                                                                          |                                                                                                                                                                 |                                                                                                                                                                   |
|                                                                                                | leukocytes <input type="text"/> <input type="radio"/> Gpt/l <input type="radio"/> 1/μl                                                                                                                                                                                                                                                                                                                                                     | Gamma-GT <input type="text"/> <input type="radio"/> μmol/l*s <input type="radio"/> U/l                                                                                                                                                                          | Creatinin i.S. <input type="text"/> <input type="radio"/> μmol/l <input type="radio"/> mg/dl                                                                                                                                                                                             | <input type="radio"/> not perf. <input type="checkbox"/> Proteinuria<br><input type="radio"/> inconvsp. <input type="checkbox"/> Hematuria |                                                                                                                                                                                                                                                                                                                                          |                                                                                                                                                                 |                                                                                                                                                                   |
| Instrumental Diagnosis                                                                         | <input type="radio"/> none <input type="checkbox"/> ileocolonoscopy <input type="checkbox"/> X-ray-Sellink <input type="checkbox"/> MRI pelvic region <input type="checkbox"/> CT abdomen                                                                                                                                                                                                                                                  |                                                                                                                                                                                                                                                                 |                                                                                                                                                                                                                                                                                          |                                                                                                                                            | <b>Complications / Surgery</b> <input type="radio"/> none                                                                                                                                                                                                                                                                                |                                                                                                                                                                 |                                                                                                                                                                   |
|                                                                                                | <input type="checkbox"/> esophagogastroduodenoscopy <input type="checkbox"/> coloscopy <input type="checkbox"/> MRI bowel <input type="checkbox"/> histology                                                                                                                                                                                                                                                                               |                                                                                                                                                                                                                                                                 |                                                                                                                                                                                                                                                                                          |                                                                                                                                            | <input type="checkbox"/> perianal fistula <input type="checkbox"/> misc. fistula<br><input type="checkbox"/> perianal abszess <input type="checkbox"/> misc. abszess<br><input type="checkbox"/> intraabdom. absz. <input type="checkbox"/> Stenosis<br><input type="checkbox"/> other: _____<br><input type="checkbox"/> OP: _____ Date |                                                                                                                                                                 |                                                                                                                                                                   |
| Location                                                                                       | <input type="checkbox"/> inconspicuous <input type="checkbox"/> no changes <input type="checkbox"/> no new information                                                                                                                                                                                                                                                                                                                     |                                                                                                                                                                                                                                                                 |                                                                                                                                                                                                                                                                                          |                                                                                                                                            |                                                                                                                                                                                                                                                                                                                                          |                                                                                                                                                                 |                                                                                                                                                                   |
|                                                                                                | <input type="checkbox"/> esophagus <input type="checkbox"/> stomach <input type="checkbox"/> duodenum                                                                                                                                                                                                                                                                                                                                      | <input type="checkbox"/> remaining small intestine <input type="checkbox"/> terminal ileum <input type="checkbox"/> cecum                                                                                                                                       | <input type="checkbox"/> colon asc. <input type="checkbox"/> colon trans. <input type="checkbox"/> colon desc.                                                                                                                                                                           | <input type="checkbox"/> sigmoideum <input type="checkbox"/> rectum <input type="checkbox"/> pouch                                         |                                                                                                                                                                                                                                                                                                                                          |                                                                                                                                                                 |                                                                                                                                                                   |
| Therapy                                                                                        | <input type="radio"/> no therapy                                                                                                                                                                                                                                                                                                                                                                                                           |                                                                                                                                                                                                                                                                 |                                                                                                                                                                                                                                                                                          |                                                                                                                                            |                                                                                                                                                                                                                                                                                                                                          | <b>presentation at ophthalmologist since last visit</b>                                                                                                         | <b>Psychosocial Therapy</b>                                                                                                                                       |
|                                                                                                | <b>Oral</b>                                                                                                                                                                                                                                                                                                                                                                                                                                | SASP (Sulfasalazin) <input type="text"/>                                                                                                                                                                                                                        | Budesonid <input type="text"/>                                                                                                                                                                                                                                                           |                                                                                                                                            |                                                                                                                                                                                                                                                                                                                                          | <input type="radio"/> no<br><input type="radio"/> yes                                                                                                           | <input type="radio"/> no<br><input type="radio"/> yes                                                                                                             |
|                                                                                                |                                                                                                                                                                                                                                                                                                                                                                                                                                            | 5-ASA (Mesalazin) <input type="text"/>                                                                                                                                                                                                                          | <input type="radio"/> Azathioprin <input type="radio"/> 6-MP <input type="text"/>                                                                                                                                                                                                        |                                                                                                                                            |                                                                                                                                                                                                                                                                                                                                          | <b>Undocumented visits since last documented presentation</b>                                                                                                   |                                                                                                                                                                   |
|                                                                                                | Corticosteroids <input type="radio"/> i.v. <input type="radio"/> p.o. <input type="text"/>                                                                                                                                                                                                                                                                                                                                                 |                                                                                                                                                                                                                                                                 | meantime steroid therapy since last documentation <input type="radio"/> no <input type="radio"/> yes                                                                                                                                                                                     |                                                                                                                                            | <input type="text"/> (Number of visits)                                                                                                                                                                                                                                                                                                  |                                                                                                                                                                 |                                                                                                                                                                   |
|                                                                                                | <b>Nutrition therapy</b>                                                                                                                                                                                                                                                                                                                                                                                                                   | <input type="checkbox"/> exclusive <input type="radio"/> p.o. <input type="radio"/> p.tube. <input type="checkbox"/> nocturnal tube feeding<br><input type="checkbox"/> caloric supplementation <input type="checkbox"/> product: _____                         |                                                                                                                                                                                                                                                                                          |                                                                                                                                            |                                                                                                                                                                                                                                                                                                                                          | <b>Informed consent: available</b> <input type="radio"/> yes                                                                                                    |                                                                                                                                                                   |
| <b>Re-ctal</b>                                                                                 | <input type="checkbox"/> 5-ASA (Mesalazin) <input type="checkbox"/> Corticosteroids <input type="checkbox"/> Budesonid                                                                                                                                                                                                                                                                                                                     |                                                                                                                                                                                                                                                                 |                                                                                                                                                                                                                                                                                          |                                                                                                                                            | <b>Medical overall assessment</b>                                                                                                                                                                                                                                                                                                        |                                                                                                                                                                 |                                                                                                                                                                   |
| <b>other</b>                                                                                   | <input type="checkbox"/> Methotrexat <input type="checkbox"/> Antibiotics <input type="checkbox"/> Complementary medicine<br><input type="checkbox"/> Cyclosporin A <input type="checkbox"/> Probiotics <input type="checkbox"/> Calcium/Vitamine D <input type="checkbox"/> Iron<br><input type="checkbox"/> Infliximab <input type="checkbox"/> Antracid <input type="checkbox"/> other: _____ <input type="checkbox"/> Vit./trace elem. |                                                                                                                                                                                                                                                                 |                                                                                                                                                                                                                                                                                          |                                                                                                                                            | <input type="radio"/> Remission<br><input type="radio"/> Light activity<br><input type="radio"/> Moderate activity<br><input type="radio"/> Heavy activity                                                                                                                                                                               |                                                                                                                                                                 |                                                                                                                                                                   |
| <b>Adverse reaction to therapy</b> <input type="radio"/> none <input type="radio"/> yes: _____ |                                                                                                                                                                                                                                                                                                                                                                                                                                            |                                                                                                                                                                                                                                                                 |                                                                                                                                                                                                                                                                                          |                                                                                                                                            |                                                                                                                                                                                                                                                                                                                                          |                                                                                                                                                                 |                                                                                                                                                                   |

Outpatient department

Signature:
