# Supplementary material for: Current and projected incidence trends of pediatric-onset inflammatory bowel disease in Germany based on the Saxon Pediatric IBD Registry 2000–2014 –a 15-year evaluation of trends
Source: PubMed Central journal article supplement (PMC9462751; doi:10.1371/journal.pone.0274117), 2022-09-09
Supplement: pone.0274117.s005.pdf [file pone.0274117.s005.pdf]

**S5 Appendix. Age-standardized incidence rates (ASR) of inflammatory bowel disease (IBD), Crohn's disease (CD), ulcerative colitis (UC) and unclassified IBD (IBD-U) per 100,000 person-years (PY) for children and adolescents < 15 years of age at diagnosis in Saxony. Annual rates 2000-2014 and total rates per one year.**

| year         | population at risk | IBD        |             |                    | CD         |            |                    | UC         |            |                    | IBD-U     |            |                    |
|--------------|--------------------|------------|-------------|--------------------|------------|------------|--------------------|------------|------------|--------------------|-----------|------------|--------------------|
|              |                    | n          | ASR         | [95 % CI]          | n          | ASR        | [95 % CI]          | n          | ASR        | [95 % CI]          | n         | ASR        | [95 % CI]          |
| 2000         | 550,835            | 30         | <b>4.6</b>  | [2.8 - 6.3]        | 21         | <b>3.3</b> | [1.8 - 4.8]        | 9          | <b>1.3</b> | [0.4 - 2.1]        | 0         | <b>0.0</b> | -                  |
| 2001         | 522,225            | 32         | <b>4.7</b>  | [3.0 - 6.3]        | 15         | <b>2.2</b> | [1.1 - 3.3]        | 15         | <b>2.2</b> | [1.1 - 3.3]        | <5        | <b>0.3</b> | [0.0 - 0.7]        |
| 2002         | 494,070            | 42         | <b>7.7</b>  | [5.3 - 10.1]       | 27         | <b>5.0</b> | [3.1 - 7.0]        | 14         | <b>2.5</b> | [1.2 - 3.8]        | <5        | <b>0.2</b> | [0.0 - 0.5]        |
| 2003         | 470,594            | 38         | <b>7.5</b>  | [5.1 - 9.9]        | 25         | <b>5.0</b> | [3.0 - 6.9]        | 13         | <b>2.6</b> | [1.2 - 4.0]        | 0         | <b>0.0</b> | -                  |
| 2004         | 451,952            | 43         | <b>9.8</b>  | [6.9 - 12.8]       | 28         | <b>6.4</b> | [4.0 - 8.7]        | 15         | <b>3.5</b> | [1.7 - 5.2]        | 0         | <b>0.0</b> | -                  |
| 2005         | 436,305            | 25         | <b>6.3</b>  | [3.8 - 8.8]        | 16         | <b>4.0</b> | [2.0 - 6.0]        | 7          | <b>1.8</b> | [0.5 - 3.1]        | <5        | <b>0.5</b> | [0.0 - 1.3]        |
| 2006         | 437,421            | 31         | <b>8.0</b>  | [5.2 - 10.8]       | 19         | <b>5.0</b> | [2.7 - 7.3]        | 11         | <b>2.8</b> | [1.1 - 4.4]        | <5        | <b>0.2</b> | [0.0 - 0.6]        |
| 2007         | 444,508            | 22         | <b>5.8</b>  | [3.3 - 8.2]        | 12         | <b>3.2</b> | [1.4 - 5.0]        | 10         | <b>2.6</b> | [1.0 - 4.2]        | 0         | <b>0.0</b> | -                  |
| 2008         | 454,198            | 35         | <b>8.3</b>  | [5.5 - 11.0]       | 23         | <b>5.4</b> | [3.2 - 7.7]        | 11         | <b>2.6</b> | [1.0 - 4.1]        | <5        | <b>0.3</b> | [0.0 - 0.8]        |
| 2009         | 464,584            | 46         | <b>10.5</b> | [7.5 - 13.6]       | 26         | <b>6.1</b> | [3.7 - 8.4]        | 17         | <b>3.8</b> | [2.0 - 5.6]        | <5        | <b>0.7</b> | [0.0 - 1.5]        |
| 2010         | 476,168            | 33         | <b>7.5</b>  | [4.9 - 10.0]       | 23         | <b>5.1</b> | [3.0 - 7.2]        | 10         | <b>2.3</b> | [0.9 - 3.8]        | 0         | <b>0.0</b> | -                  |
| 2011         | 480,220            | 33         | <b>7.5</b>  | [4.9 - 10.0]       | 20         | <b>4.6</b> | [2.6 - 6.6]        | 13         | <b>2.9</b> | [1.3 - 4.5]        | 0         | <b>0.0</b> | -                  |
| 2012         | 488,364            | 45         | <b>9.8</b>  | [6.9 - 12.7]       | 34         | <b>7.5</b> | [5.0 - 10.0]       | 8          | <b>1.7</b> | [0.5 - 2.9]        | <5        | <b>0.6</b> | [0.0 - 1.3]        |
| 2013         | 496,028            | 38         | <b>8.2</b>  | [5.6 - 10.8]       | 25         | <b>5.4</b> | [3.3 - 7.5]        | 12         | <b>2.6</b> | [1.1 - 4.1]        | <5        | <b>0.2</b> | [0.0 - 0.7]        |
| 2014         | 504,802            | 39         | <b>8.2</b>  | [5.6 - 10.8]       | 24         | <b>5.1</b> | [3.0 - 7.1]        | 11         | <b>2.4</b> | [1.0 - 3.7]        | <5        | <b>0.8</b> | [0.0 - 1.6]        |
| <b>Total</b> | <b>7,172,274</b>   | <b>532</b> | <b>7.5</b>  | <b>[6.7 - 8.1]</b> | <b>338</b> | <b>4.8</b> | <b>[4.3 - 5.3]</b> | <b>176</b> | <b>2.5</b> | <b>[2.1 - 2.9]</b> | <b>18</b> | <b>0.3</b> | <b>[0.1 - 0.4]</b> |

Legend: source of population data [31].
