# Supplementary material for: Current and projected incidence trends of pediatric-onset inflammatory bowel disease in Germany based on the Saxon Pediatric IBD Registry 2000–2014 –a 15-year evaluation of trends
Source: PubMed Central journal article supplement (PMC9462751; doi:10.1371/journal.pone.0274117), 2022-09-09
Supplement: pone.0274117.s006.pdf [file pone.0274117.s006.pdf]

**S6 Appendix. Projected number of children and adolescents <15 years of age at diagnosis with inflammatory bowel disease (IBD), Crohn's disease (CD) und ulcerative colitis (UC) per 100,000 person-years (PY) in Saxony to the years 2025 and 2030 (and by age and sex).**

| Cohort                  | Population at risk | Year | IBD         |               | CD          |               | UC         |             |
|-------------------------|--------------------|------|-------------|---------------|-------------|---------------|------------|-------------|
|                         |                    |      | n           | [95 % CrI]    | n           | [95 % CrI]    | n          | [95 % CrI]  |
| <b>Supplementary AG</b> |                    |      |             |               |             |               |            |             |
| M-AG 0-4                | 90,000             | 2025 | <b>3.3</b>  | [3.0 – 3.6]   | <b>2.4</b>  | [2.1 – 2.7]   | <b>0.6</b> | [0.5 – 0.7] |
|                         | 84,000             | 2030 | <b>3.6</b>  | [3.2 – 4.0]   | <b>2.7</b>  | [2.3 – 3.1]   | <b>0.6</b> | [0.5 – 0.8] |
| M-AG 5-9                | 96,000             | 2025 | <b>10.2</b> | [9.3 – 11.0]  | <b>7.4</b>  | [6.7 – 8.2]   | <b>2.1</b> | [1.8 – 2.4] |
|                         | 91,000             | 2030 | <b>11.4</b> | [10.2 – 12.6] | <b>8.5</b>  | [7.4 – 9.6]   | <b>2.2</b> | [1.8 – 2.6] |
| F-AG 0-4                | 85,000             | 2025 | <b>2.3</b>  | [2.1 – 2.5]   | <b>1.5</b>  | [1.3 – 1.7]   | <b>0.6</b> | [0.5 – 0.7] |
|                         | 80,000             | 2030 | <b>2.5</b>  | [2.2 – 2.8]   | <b>1.7</b>  | [1.4 – 1.9]   | <b>0.6</b> | [0.5 – 0.7] |
| F-AG 5-9                | 92,000             | 2025 | <b>7.2</b>  | [6.6 – 7.9]   | <b>4.7</b>  | [4.2 – 5.2]   | <b>2.0</b> | [1.7 – 2.3] |
|                         | 87,000             | 2030 | <b>8.1</b>  | [7.2 – 8.9]   | <b>5.4</b>  | [4.6 – 6.1]   | <b>2.0</b> | [1.7 – 2.4] |
| AG 0-4                  | 175,000            | 2025 | <b>5.5</b>  | [5.2 – 5.9]   | <b>3.9</b>  | [3.6 – 4.2]   | <b>1.2</b> | [1.1 – 1.4] |
|                         | 164,000            | 2030 | <b>6.1</b>  | [5.6 – 6.5]   | <b>4.4</b>  | [3.9 – 4.8]   | <b>1.2</b> | [1.1 – 1.4] |
| AG 5-9                  | 188,000            | 2025 | <b>17.4</b> | [16.4 – 18.5] | <b>12.1</b> | [11.2 – 13.1] | <b>4.1</b> | [3.7 – 4.5] |
|                         | 178,000            | 2030 | <b>19.4</b> | [18.0 – 20.9] | <b>13.9</b> | [12.5 – 15.2] | <b>4.2</b> | [3.6 – 4.8] |

Legend: M = male, F = female; source of population data [32].
